# Supplementary material for: An fMRI Pilot Study of Cognitive Flexibility in Trichotillomania
Source: Atypon-hosted journal article supplement (doi:10.1176/appi.neuropsych.18030038), 2018-08-24
Supplement: appi.neuropsych.18030038.ds001.pdf [file appi.neuropsych.18030038.ds001.pdf]

**Figure S1**  
**Supplementary materials**

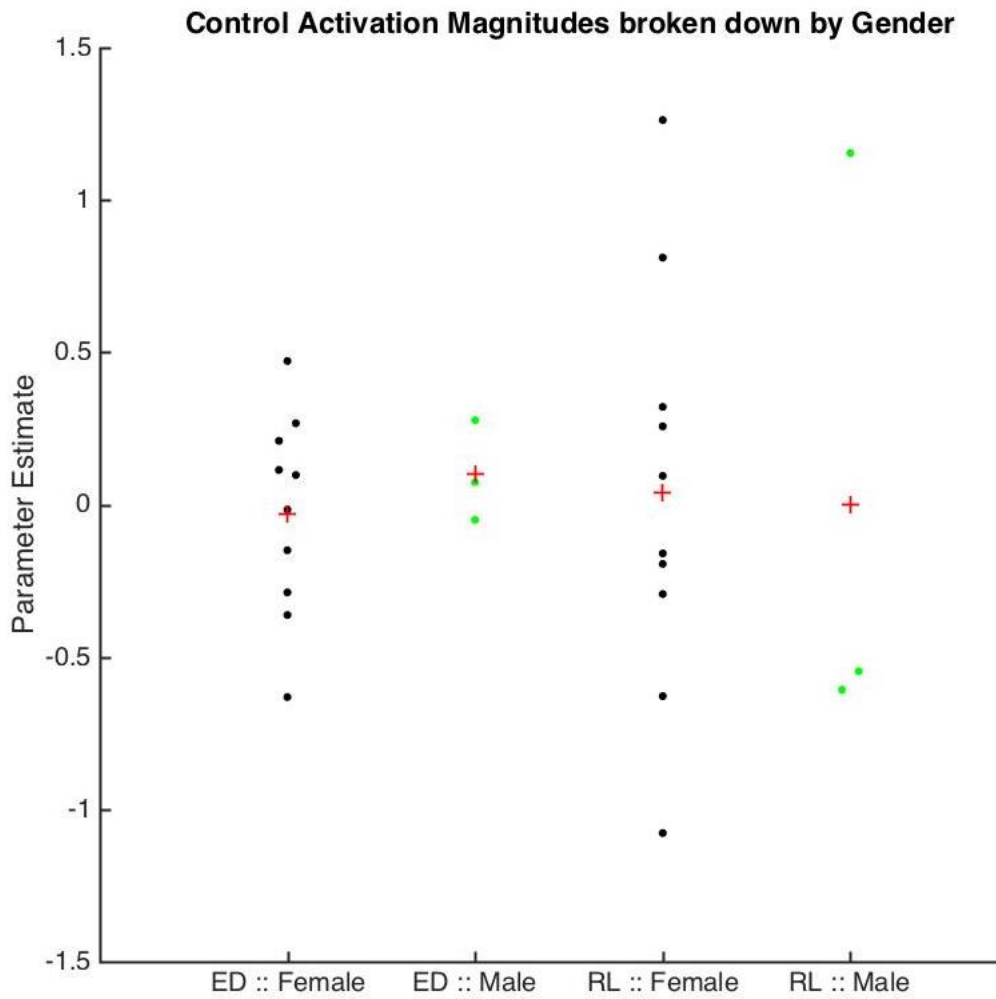

Supplementary Figure 1. Examination of gender within the control group (10 Female, 3 Male). Parameter estimates were averaged across regions of interest (ROI) within subject and plotted by the Extradimensional switch (ED) & Reversal Learning (RL) events & gender (Black = Female, Green = Male). Red crosses represent the group mean.
